# Supplementary material for: Genetic and epigenetic characteristics in ovarian tissues from polycystic ovary syndrome patients with irregular menstruation resemble those of ovarian cancer
Source: PubMed Central journal article supplement (PMC6416936; doi:10.1186/s12902-019-0356-5), 2019-03-12
Supplement: 12902_2019_356_MOESM1_ESM.pdf [file 12902_2019_356_MOESM1_ESM.pdf]

**Additional file 1.** Primers used in this study.

| <b>Gene</b> | <b>Forward primer</b>       | <b>Reverse primer</b>            |
|-------------|-----------------------------|----------------------------------|
| ACLY        | GTGTGGACGTGGGTGATGTG        | TTTGATGTCCTCAGGATTCAGTTTC        |
| ADM         | ATGAAGCTGGTTTCCGTCG         | GACATCCGCAGTTCCTCTT              |
| ANGPT1      | GTGCTCACGTGGCTCGACTATA      | GCTCAGCAGTTTCTTCCCTTTTT          |
| ANGPT2      | TTTACTCTGAGCTGTGATCTTGTCTTG | GACCTGATATTGCTTCTTTCCTATGC       |
| ARNT        | CTGCCAACCCCGAAATGACAT       | CGCCGCTTAATAGCCCTCTG             |
| ATP5A1      | ATGACGACTTATCCAAACAGGC      | CGGGAGTGTAGGTAGAACACAT           |
| AURKA       | GAGGTCCAAAACGTGTTCTCG       | ACAGGATGAGGTACACTGGTTG           |
| BCL2L11     | CCCAAGAGTTGCGGCGTAT         | ACATGACAACACTACACGACAACCTCCT     |
| BIRC3       | AGCTTGCAAGTGCGGGTTT         | CCACCATCACAGCAAAAGCA             |
| BMI1        | CTTGGCTCGCATTCAATTTCT       | CACATCAGGTGGGGATTTAGC            |
| CA9         | TTTGCCAGAGTTGACGAGGC        | GCTCATAGGCACTGTTTTCTTCC          |
| CASP2       | AGCTGTTGTTGAGCGAATTGT       | AGCAAGTTGAGGAGTTCCACA            |
| CASP7       | TGGAAAATGGAGCCATGACAA       | AAGGTATTCTTATCTGTCTCAGCTC<br>ACT |
| CASP9       | AAGCCCAAGCTCTTTTTTCATC      | ACTCGTCTTCAGGGGAAGTG             |
| CCL2        | CAGCCAGATGCAATCAATGCC       | TGGAATCCTGAACCCACTTCT            |
| CCND3       | TACCCGCCATCCATGATCG         | AGGCAGTCCACTTCAGTGC              |
| CDC20       | GCACAGTTCGCGTTCGAGA         | CTGGATTTGCCAGGAGTTCGG            |
| CFLAR       | TCAGCCTTCCAAGATAGATACTCCAT  | AACCCACGTGGATCATCTATGC           |
| CPT2        | CATACAAGCTACATTTCCGGACC     | AGCCCGGAGTGTCTTCAGAA             |
| DDB2        | ACCTCCGAGATTGTATTACGCC      | TCACATCTTCTGCTAGGACCG            |
| DDIT3       | GGAAACAGAGTGGTCATTCCC       | CTGCTTGAGCCGTTCAATTCTC           |
| DKC1        | GCTAAGTTGGACACGTCTCAG       | TGCAAGAGGTGTATAGTGTGTTG          |
| E2F4        | ATCGGGCTAATCGAGAAAAAGTC     | TGCTGGTCTAGTTCTTGCTCC            |
| ERCC3       | CTAACTGCCTACTCCTTGATGC      | TCCATAGCTGACAGTACACAACCT         |
| ERCC5       | TGCAGTCCGTCGTAGAAGAATT      | GAGCCGATGAAACAAAGTGAGA           |
| FASLG       | CCCATTTAACAGGCAAGTCCAA      | CCAGAAAGCAGGACAATTCCAT           |
| FGF2        | AGTGTGTGCTAACCGTTACCT       | ACTGCCCAGTTCGTTTCAGTG            |
| FOXC2       | CGCCTAAGGACCTGGTGAAG        | CCATGATGAACTGGTAGATGCC           |
| G6PD        | CTTTGCCCGCAACTCCTATG        | GGCATTCAATGTGGCTGTTGA            |
| GADD45G     | CAGATCCATTTTACGCTGATCCA     | TCCTCGCAAAAACAGGCTGAG            |
| GPD2        | CACCAGAGGACTAAAAACAGCC      | GGAGCTGATAAATGGGGAGCA            |
| GSC         | CCTCCGCGAGGAGAAAGT          | CGTTCTCCGACTCCTCTGAT             |
| HMOX1       | CAGCTGTCTCAAACCTCCAAAAG     | AGTGGTCATGGCCGTGTCA              |
| IGFBP3      | AGCCAGCGCTACAAAGTTGACT      | GCTTGGACTCGGAGGAGAAGTT           |
| IGFBP5      | ACCTGAGATGAGACAGGAGTC       | GTAGAATCCTTTGCGGTCACAA           |
| KDR         | CACCACTCAAACGCTGACATGTA     | CCAAGTCCAATACCAGTGGAT            |
| KRT14       | GTGGTGATGGGCTTCTGG          | CCATTGATGTCGGCTTCC               |
| LDHA        | TTGACCTACGTGGCTTGAAG        | GGTAACGGAATCGGGCTGAAT            |
| LIG4        | AGCAAAAGTGGCTTATACGGATG     | TGAGTCTACAGAAGGATCATGC           |
| LPL         | TCATTCCCAGGAGTAGCAGAGT      | GGCCACAAGTTTTGGCACC              |
| MAPK14      | TGGATTTTGGACTGGCTCG         | CATGGCTTGGCATCCTGTTA             |
| MCM2        | ATGGCGGAATCATCGGAATCC       | GGTGAGGGCATCAGTACGC              |
| NOL3        | GACCGCAGCTATGACCCTC         | CTCCGGTTCAGCCTCTTTAGA            |
| OCLN        | AGGAACCGAGAGCCAGGT          | TGAGCAATGCCCTTTAGCTT             |
| PFKL        | GGTGGGTTTGAGGCCTATGAA       | GGGACGTTGTTGCTGATGGT             |
| PGF         | GAACGGCTCGTCAGAGGTG         | ACAGTGCAGATTCTCATCGCC            |

|          |                           |                          |
|----------|---------------------------|--------------------------|
| PINX1    | CCAGCGGATGCTAGAGAAGAT     | CGAGTCCCAGGTGGTTATTTTC   |
| PPP1R15A | ATGATGGCATGTATGGTGAGC     | AACCTTGCAGTGCCTTATCAG    |
| SERPINF1 | TTCAAAGTCCCCGTGAACAAG     | GAGAGCCCCGGTGAATGATGG    |
| SKP2     | ATGCCCCAATCTTGTCCATCT     | CACCGACTGAGTGATAGGTGT    |
| SNAI1    | TCGGAAGCCTAACTACAGCGA     | AGATGAGCATTGGCAGCGAG     |
| SNAI2    | CCATTCCACGCCAGCTA         | TCACTCGCCCCAAAGATGAG     |
| SNAI3    | ACTGCGACAAGGAGTACACC      | GAGTGCGTTTGCAGATGGG      |
| SOD1     | GCTGGTTTTCGTCGTAGT        | TTCTGCTCGAAATTGATG       |
| SOX10    | CCTCACAGATCGCCTACACC      | CATATAGGAGAAGGCCGAGTAGA  |
| STMN1    | TCAGCCCTCGGTCAAAAAGAAAT   | TTCTCGTGCTCTCGTTTTCTCA   |
| TBX2     | CACGGCTTCACCATCCTAAAC     | TGCGGAAGGTGCTGTAAGG      |
| TEK      | TTAGCCAGCTTAGTTCTCTGTGG   | AGCATCAGATAACAAGAGGTAGGG |
| TERF1    | TGCCGACCCTACTGAGGAG       | GCAGAGGAAATCGAGCATCCA    |
| TERF2IP  | TGAAGGACCGCTACCTCAAG      | GGCTTCCACAAGCATCTTTTTG   |
| TINF2    | TTGGAGGCACAGGAACTTTT      | AGGGTTCCCCATACTCTTGTTT   |
| TNKS2    | CAACTGCCACGCAAGTGATG      | AGAGGAGTGAATTGCCACAAG    |
| UQCRFS1  | ACCCCTGTTTGTGCGTCATAG     | AAGGGCAGTAATAACCACCAAAA  |
| VEGFC    | CTCTCAAGGCCCCAAACCA       | GACATGCATCGGCAGGAAGT     |
| WEE1     | AACAAGGATCTCCAGTCCACA     | GGGCAAGCGCAAAAATATCTG    |
| XIAP     | ACCTGCAGACATCAATAAGGAAGAA | ACCGCACGGTATCTCCTTCAC    |
| GAPDH    | ACGGATTTGGTTCGTATTGGG     | CGCTCCTGGAAGATGGTGAT     |

---
