# Supplementary material for: Genetic and epigenetic characteristics in ovarian tissues from polycystic ovary syndrome patients with irregular menstruation resemble those of ovarian cancer
Source: PubMed Central journal article supplement (PMC6416936; doi:10.1186/s12902-019-0356-5), 2019-03-12
Supplement: 12902_2019_356_MOESM2_ESM.pdf [file 12902_2019_356_MOESM2_ESM.pdf]

**Additional file 2.** Information of 46 normal ovary tissue samples downloaded from the GEO database.

| <b>Rank</b> | <b>GSE series number</b> | <b>GSM number for samples</b>                                                                                                                                       | <b>Samples counts</b> | <b>Platform</b>                             |
|-------------|--------------------------|---------------------------------------------------------------------------------------------------------------------------------------------------------------------|-----------------------|---------------------------------------------|
| 1           | GSE18521                 | GSM462643,<br>GSM462644,<br>GSM462645,<br>GSM462646,<br>GSM462647,<br>GSM462648,<br>GSM462649,<br>GSM462650,<br>GSM462651,<br>GSM462652                             | 10                    | Affymetrix Human Genome U133 Plus 2.0 Array |
| 2           | GSE27651                 | GSM372258,<br>GSM372259,<br>GSM372260,<br>GSM372261,<br>GSM372262,<br>GSM372263                                                                                     | 6                     | Affymetrix Human Genome U133 Plus 2.0 Array |
| 3           | GSE34405                 | GSM848593,<br>GSM848594,<br>GSM848595                                                                                                                               | 3                     | Affymetrix Human Genome U133A Array         |
| 4           | GSE38666                 | GSM947277,<br>GSM947278,<br>GSM947279,<br>GSM947280,<br>GSM947281,<br>GSM947282,<br>GSM947283,<br>GSM947284,<br>GSM947285,<br>GSM947286,<br>GSM947287,<br>GSM947288 | 12                    | Affymetrix Human Genome U133 Plus 2.0 Array |
| 5           | GSE36668                 | GSM898305,<br>GSM898306,<br>GSM898307,<br>GSM898308                                                                                                                 | 4                     | Affymetrix Human Genome U133 Plus 2.0 Array |
| 6           | GSE43346                 | GSM1060767                                                                                                                                                          | 1                     | Affymetrix Human Genome U133 Plus 2.0 Array |
| 7           | GSE1133                  | GSM18838,<br>GSM18839,<br>GSM18997,                                                                                                                                 | 4                     | Affymetrix Human Genome U133A Array         |

|       |           |                                                                        |    |                                                   |
|-------|-----------|------------------------------------------------------------------------|----|---------------------------------------------------|
| 8     | GSE2361   | GSM18998<br>GSM44674                                                   | 1  | Affymetrix Human<br>Genome U133A Array            |
| 9     | GSE105437 | GSM2825980,<br>GSM2825981,<br>GSM2825982,<br>GSM2825983,<br>GSM2825984 | 5  | Affymetrix Human<br>Genome U133 Plus 2.0<br>Array |
| Total |           |                                                                        | 46 |                                                   |

---
